# Supplementary material
Source: PubMed Central journal article supplement (PMC517905)
Supplement: molcellb_24_20_9038__1.pdf [file molcellb_24_20_9038__1.pdf]

Fig. S1

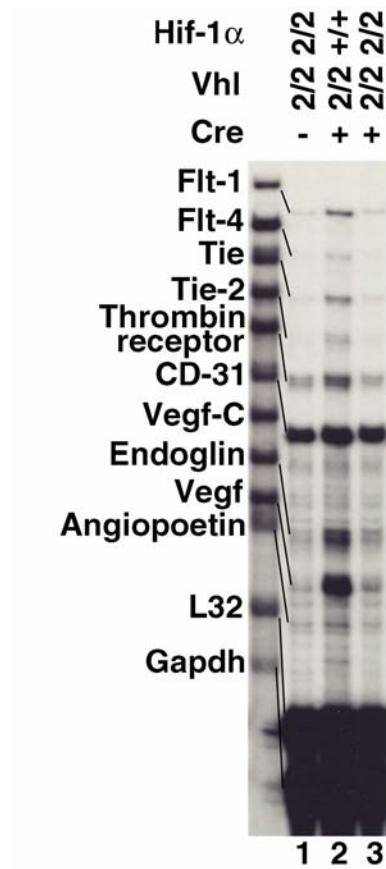

**Figure S1: Hif-1 dependence of angiogenic gene expression in *Vhlh* deficient thymi.**

Expression analysis of *Vegf-A*, *Vegf* receptors *Flt-1* and *-4* and endothelial cell markers

*CD-31* and *endoglin* by RPA using total RNA.

Fig. S2

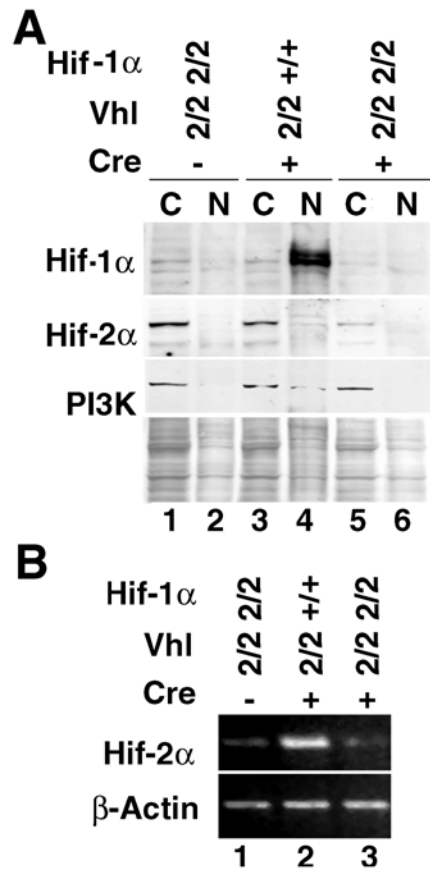

**Figure S2: Hif-2 $\alpha$  is non-detectable in nuclear fraction from *Vhlh*<sup>-/-</sup> thymocytes. (A)** Cytoplasmic trapping of Hif-2 $\alpha$  in *Vhlh* deficient thymocytes. Shown are protein levels of Hif-1 $\alpha$  and Hif-2 $\alpha$  in cytoplasmic (C) and nuclear fractions (N) using Western blot analysis. Staining with Ponceau S is shown to demonstrate equal loading. Cytoplasmic PI3 kinase was used to assess nuclear fraction purity. **(B)** *Hif-2 $\alpha$*  mRNA levels are induced in *Vhlh*<sup>-/-</sup> thymocytes in a Hif-1 dependent manner. Shown are results from semi-quantitative RT-PCR studies in FACS sorted DP thymocytes.  $\beta$ -actin is used to normalize mRNA.

Fig. S3

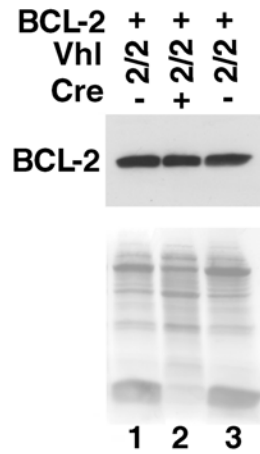

**Figure S3:** *BCL-2* transgene expression in *Vhlh*<sup>-/-</sup> thymocytes. Human BCL-2 transgene expression in mutant and control mice by Western blot using a species-specific anti-human BCL-2 antibody.

Fig. S4

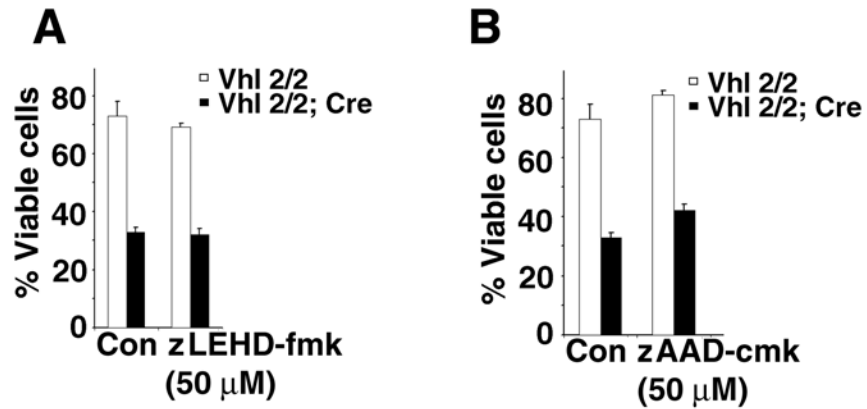

**Figure S4: Inhibition of caspase-9 or granzyme-B does not prevent thymocyte death *in vitro*.** Shown is the percentage of viable cells in cultures of control and *Vhlh* deficient thymocytes treated for 24hr with (A) caspase-9 inhibitor zLEHD-fmk and (B) Granzyme B inhibitor zAAD-cmk. Viability was assessed with 7-AAD staining. DMSO treated cells were used as control (Con). Shown are the mean values  $\pm$  SD for n= 3 mice, individual experiments were carried out in triplicates.
